# Supplementary material for: Plasma 25-Hydroxyvitamin D Concentrations are Associated with Polyunsaturated Fatty Acid Metabolites in Young Children: Results from the Vitamin D Antenatal Asthma Reduction Trial
Source: MDPI journal article supplement (doi:10.3390/metabo10040151), 2020-04-14
Supplement: s1 [file s1]

**Title:** Plasma 25-hydroxyvitamin D concentrations are associated with polyunsaturated fatty acid metabolites in young children: results from the Vitamin D Antenatal Asthma Reduction Trial

**Author Names:**

Mengna Huang, Rachel S. Kelly, Priyadarshini Kachroo, Su H. Chu, Kathleen Lee-Sarwar, Bo L. Chawes, Hans Bisgaard, Augusto A. Litonjua, Scott T. Weiss, Jessica Lasky-Su

**Online Supplemental Material 2**  
**Supplemental Tables**

**Contents**

|                            |    |
|----------------------------|----|
| Supplemental Table S1..... | 2  |
| Supplemental Table S2..... | 4  |
| Supplemental Table S3..... | 6  |
| Supplemental Table S4..... | 8  |
| Supplemental Table S5..... | 9  |
| Supplemental Table S6..... | 10 |
| Supplemental Table S7..... | 11 |
| Supplemental Table S8..... | 12 |

**Supplemental Table S1.** Metabolites with *P*-values below the ENT80 threshold ( $8.27 \times 10^{-4}$ ) for their associations with plasma 25(OH)D levels in VDAART children at age 1 (sorted by *P*-values)

| Metabolite                                | Super-pathway | Sub-pathway                                                  | Estimated beta | Standard error | <i>P</i> -value | BH FDR   | BY FDR   |
|-------------------------------------------|---------------|--------------------------------------------------------------|----------------|----------------|-----------------|----------|----------|
| docosadienoate (22:2n6)                   | Lipid         | Long Chain Polyunsaturated Fatty Acid (n3 and n6)            | -2.75          | 0.48           | 1.93E-08        | 9.85E-06 | 6.71E-05 |
| sphingomyelin (d18:2/24:2)                | Lipid         | Sphingomyelins                                               | -2.41          | 0.49           | 1.17E-06        | 2.22E-04 | 1.52E-03 |
| 1,5-anhydroglucitol (1,5-AG)              | Carbohydrate  | Glycolysis, Gluconeogenesis, and Pyruvate Metabolism         | -2.43          | 0.50           | 1.42E-06        | 2.22E-04 | 1.52E-03 |
| ergothioneine                             | Xenobiotics   | Food Component/Plant                                         | -2.53          | 0.52           | 1.74E-06        | 2.22E-04 | 1.52E-03 |
| docosapentaenoate (DPA; 22:5n3)           | Lipid         | Long Chain Polyunsaturated Fatty Acid (n3 and n6)            | -2.39          | 0.50           | 2.78E-06        | 2.84E-04 | 1.93E-03 |
| dihomolinoleate (20:2n6)                  | Lipid         | Long Chain Polyunsaturated Fatty Acid (n3 and n6)            | -2.18          | 0.49           | 9.66E-06        | 7.11E-04 | 4.84E-03 |
| docosapentaenoate (n6 DPA; 22:5n6)        | Lipid         | Long Chain Polyunsaturated Fatty Acid (n3 and n6)            | -2.27          | 0.51           | 9.74E-06        | 7.11E-04 | 4.84E-03 |
| 4-hydroxychlorothalonil                   | Xenobiotics   | Chemical                                                     | -2.48          | 0.56           | 1.38E-05        | 8.05E-04 | 5.49E-03 |
| N-acetylmethionine                        | Amino Acid    | Methionine, Cysteine, SAM and Taurine Metabolism             | -2.16          | 0.49           | 1.42E-05        | 8.05E-04 | 5.49E-03 |
| erucate (22:1n9)                          | Lipid         | Long Chain Monounsaturated Fatty Acid                        | -2.07          | 0.48           | 2.17E-05        | 1.11E-03 | 7.56E-03 |
| glycine                                   | Amino Acid    | Glycine, Serine and Threonine Metabolism                     | -2.06          | 0.49           | 3.03E-05        | 1.41E-03 | 9.59E-03 |
| 1-palmitoyl-GPE (16:0)                    | Lipid         | Lysophospholipid                                             | -2.00          | 0.48           | 4.22E-05        | 1.70E-03 | 1.16E-02 |
| dihomolinolenate (20:3n3 or 3n6)          | Lipid         | Long Chain Polyunsaturated Fatty Acid (n3 and n6)            | -2.08          | 0.50           | 4.40E-05        | 1.70E-03 | 1.16E-02 |
| 1,2-dipalmitoyl-GPC (16:0/16:0)           | Lipid         | Phosphatidylcholine (PC)                                     | -2.03          | 0.49           | 4.73E-05        | 1.70E-03 | 1.16E-02 |
| dihomo-linoleoylcarnitine (C20:2)         | Lipid         | Fatty Acid Metabolism (Acyl Carnitine, Polyunsaturated)      | -2.00          | 0.49           | 5.00E-05        | 1.70E-03 | 1.16E-02 |
| sphingomyelin (d18:2/24:1, d18:1/24:2)    | Lipid         | Sphingomyelins                                               | -2.00          | 0.49           | 5.44E-05        | 1.74E-03 | 1.18E-02 |
| serine                                    | Amino Acid    | Glycine, Serine and Threonine Metabolism                     | -1.96          | 0.49           | 7.21E-05        | 2.17E-03 | 1.48E-02 |
| N-acetyltaurine                           | Amino Acid    | Methionine, Cysteine, SAM and Taurine Metabolism             | -1.95          | 0.49           | 7.75E-05        | 2.20E-03 | 1.50E-02 |
| 2-stearoyl-GPE (18:0)                     | Lipid         | Lysophospholipid                                             | -1.91          | 0.48           | 9.04E-05        | 2.43E-03 | 1.66E-02 |
| N-palmitoylglycine                        | Lipid         | Fatty Acid Metabolism (Acyl Glycine)                         | -1.91          | 0.49           | 1.23E-04        | 3.15E-03 | 2.14E-02 |
| S-methylcysteine                          | Amino Acid    | Methionine, Cysteine, SAM and Taurine Metabolism             | -1.86          | 0.49           | 1.74E-04        | 4.24E-03 | 2.89E-02 |
| indolelactate                             | Amino Acid    | Tryptophan Metabolism                                        | -1.84          | 0.49           | 2.08E-04        | 4.69E-03 | 3.20E-02 |
| palmitoylcarnitine (C16)                  | Lipid         | Fatty Acid Metabolism (Acyl Carnitine, Long Chain Saturated) | -1.84          | 0.49           | 2.11E-04        | 4.69E-03 | 3.20E-02 |
| 2-palmitoyl-GPC* (16:0)                   | Lipid         | Lysophospholipid                                             | -1.81          | 0.49           | 2.31E-04        | 4.85E-03 | 3.30E-02 |
| dihomo-linolenoylcarnitine (C20:3n3 or 6) | Lipid         | Fatty Acid Metabolism (Acyl Carnitine, Polyunsaturated)      | -1.83          | 0.49           | 2.37E-04        | 4.85E-03 | 3.30E-02 |
| arachidate (20:0)                         | Lipid         | Long Chain Saturated Fatty Acid                              | -1.80          | 0.49           | 2.60E-04        | 5.10E-03 | 3.48E-02 |

Online Supplementary File 2

| Metabolite                               | Super-pathway | Sub-pathway                                                  | Estimated beta | Standard error | P-value  | BH FDR   | BY FDR   |
|------------------------------------------|---------------|--------------------------------------------------------------|----------------|----------------|----------|----------|----------|
| ornithine                                | Amino Acid    | Urea cycle; Arginine and Proline Metabolism                  | -1.84          | 0.50           | 2.72E-04 | 5.15E-03 | 3.51E-02 |
| sphingomyelin (d18:2/16:0, d18:1/16:1)   | Lipid         | Sphingomyelins                                               | -1.80          | 0.49           | 3.06E-04 | 5.46E-03 | 3.72E-02 |
| arachidonate (20:4n6)                    | Lipid         | Long Chain Polyunsaturated Fatty Acid (n3 and n6)            | -1.78          | 0.49           | 3.10E-04 | 5.46E-03 | 3.72E-02 |
| eicosenoylcarnitine (C20:1)              | Lipid         | Fatty Acid Metabolism (Acyl Carnitine, Monounsaturated)      | -1.76          | 0.49           | 3.43E-04 | 5.84E-03 | 3.98E-02 |
| eicosapentaenoate (EPA; 20:5n3)          | Lipid         | Long Chain Polyunsaturated Fatty Acid (n3 and n6)            | -1.80          | 0.50           | 3.63E-04 | 5.99E-03 | 4.08E-02 |
| 1-palmitoyl-GPC (16:0)                   | Lipid         | Lysophospholipid                                             | -1.72          | 0.49           | 4.47E-04 | 7.14E-03 | 4.87E-02 |
| myristoylcarnitine (C14)                 | Lipid         | Fatty Acid Metabolism (Acyl Carnitine, Long Chain Saturated) | -1.73          | 0.49           | 4.75E-04 | 7.35E-03 | 5.01E-02 |
| N-palmitoyl-sphingosine (d18:1/16:0)     | Lipid         | Ceramides                                                    | -1.70          | 0.49           | 5.12E-04 | 7.69E-03 | 5.24E-02 |
| palmitoyl-linoleoyl-glycerol (16:0/18:2) | Lipid         | Diacylglycerol                                               | -1.68          | 0.49           | 5.83E-04 | 8.52E-03 | 5.80E-02 |
| 5-oxoproline                             | Amino Acid    | Glutathione Metabolism                                       | -1.68          | 0.49           | 6.51E-04 | 9.24E-03 | 6.30E-02 |
| stearate (18:0)                          | Lipid         | Long Chain Saturated Fatty Acid                              | -1.67          | 0.49           | 7.12E-04 | 9.50E-03 | 6.47E-02 |
| linoleate (18:2n6)                       | Lipid         | Long Chain Polyunsaturated Fatty Acid (n3 and n6)            | -1.65          | 0.48           | 7.23E-04 | 9.50E-03 | 6.47E-02 |
| hydroxyproline                           | Amino Acid    | Urea cycle; Arginine and Proline Metabolism                  | -1.75          | 0.52           | 7.38E-04 | 9.50E-03 | 6.47E-02 |
| 1-stearoyl-GPE (18:0)                    | Lipid         | Lysophospholipid                                             | -1.65          | 0.49           | 7.44E-04 | 9.50E-03 | 6.47E-02 |

Abbreviations: ENT80, effective number of independent tests that accounts for 80% of variation in metabolites; VDAART, Vitamin D Antenatal Asthma Reduction Trial; 25(OH)D, 25-hydroxyvitamin D.

**Supplemental Table S2.** Metabolites with *P*-values below the ENT80 threshold ( $9.67\text{E-}4$ ) for their associations with plasma 25(OH)D levels in VDAART children at age 3 (sorted by *P*-values)

| Metabolite                                | Super-pathway             | Sub-pathway                                       | Estimated beta | Standard error | <i>P</i> -value | BH FDR   | BY FDR   |
|-------------------------------------------|---------------------------|---------------------------------------------------|----------------|----------------|-----------------|----------|----------|
| gamma-glutamylglycine                     | Peptide                   | Gamma-glutamyl Amino Acid                         | -2.34          | 0.41           | 1.64E-08        | 8.40E-06 | 5.72E-05 |
| erythronate                               | Carbohydrate              | Aminosugar Metabolism                             | -1.90          | 0.40           | 2.59E-06        | 6.18E-04 | 4.21E-03 |
| gamma-glutamylglutamate                   | Peptide                   | Gamma-glutamyl Amino Acid                         | -1.90          | 0.41           | 3.63E-06        | 6.18E-04 | 4.21E-03 |
| gamma-glutamylhistidine                   | Peptide                   | Gamma-glutamyl Amino Acid                         | -1.85          | 0.40           | 5.39E-06        | 6.89E-04 | 4.69E-03 |
| 1-linoleoyl-GPE (18:2)                    | Lipid                     | Lysophospholipid                                  | -1.78          | 0.40           | 1.18E-05        | 1.17E-03 | 7.95E-03 |
| gamma-glutamylvaline                      | Peptide                   | Gamma-glutamyl Amino Acid                         | -1.79          | 0.41           | 1.37E-05        | 1.17E-03 | 7.95E-03 |
| pantothenate (Vitamin B5)                 | Cofactors and<br>Vitamins | Pantothenate and CoA Metabolism                   | 1.78           | 0.41           | 2.11E-05        | 1.36E-03 | 9.27E-03 |
| 1-palmitoyl-2-linoleoyl-GPI (16:0/18:2)   | Lipid                     | Phosphatidylinositol (PI)                         | -1.69          | 0.39           | 2.13E-05        | 1.36E-03 | 9.27E-03 |
| O-sulfo-L-tyrosine                        | Xenobiotics               | Chemical                                          | -1.67          | 0.40           | 2.97E-05        | 1.69E-03 | 1.15E-02 |
| 1-arachidonoyl-GPE (20:4n6)               | Lipid                     | Lysophospholipid                                  | -1.67          | 0.40           | 3.62E-05        | 1.72E-03 | 1.17E-02 |
| glycerophosphoethanolamine                | Lipid                     | Phospholipid Metabolism                           | -1.63          | 0.39           | 3.74E-05        | 1.72E-03 | 1.17E-02 |
| 1-palmitoyl-2-linoleoyl-GPC (16:0/18:2)   | Lipid                     | Phosphatidylcholine (PC)                          | -1.70          | 0.41           | 4.17E-05        | 1.72E-03 | 1.17E-02 |
| valylglycine                              | Peptide                   | Dipeptide                                         | -1.66          | 0.40           | 4.66E-05        | 1.72E-03 | 1.17E-02 |
| linoleate (18:2n6)                        | Lipid                     | Long Chain Polyunsaturated Fatty Acid (n3 and n6) | -1.65          | 0.40           | 4.70E-05        | 1.72E-03 | 1.17E-02 |
| hydroxyproline                            | Amino Acid                | Urea cycle; Arginine and Proline Metabolism       | -1.67          | 0.41           | 5.06E-05        | 1.72E-03 | 1.17E-02 |
| 1-stearoyl-GPE (18:0)                     | Lipid                     | Lysophospholipid                                  | -1.57          | 0.39           | 6.57E-05        | 1.87E-03 | 1.28E-02 |
| oleoyl-linoleoyl-glycerol (18:1/18:2) [1] | Lipid                     | Diacylglycerol                                    | -1.60          | 0.40           | 6.76E-05        | 1.87E-03 | 1.28E-02 |
| 1-oleoyl-GPE (18:1)                       | Lipid                     | Lysophospholipid                                  | -1.61          | 0.40           | 6.87E-05        | 1.87E-03 | 1.28E-02 |
| gamma-tocopherol/beta-tocopherol          | Cofactors and<br>Vitamins | Tocopherol Metabolism                             | -1.67          | 0.41           | 6.99E-05        | 1.87E-03 | 1.28E-02 |
| 1-stearoyl-2-arachidonoyl-GPI (18:0/20:4) | Lipid                     | Phosphatidylinositol (PI)                         | -1.60          | 0.40           | 7.33E-05        | 1.87E-03 | 1.28E-02 |
| N-palmitoylglycine                        | Lipid                     | Fatty Acid Metabolism (Acyl Glycine)              | -1.57          | 0.40           | 9.27E-05        | 2.26E-03 | 1.54E-02 |
| tyramine O-sulfate                        | Amino Acid                | Tyrosine Metabolism                               | -1.60          | 0.41           | 1.04E-04        | 2.42E-03 | 1.65E-02 |
| 1-linoleoyl-GPC (18:2)                    | Lipid                     | Lysophospholipid                                  | -1.54          | 0.40           | 1.22E-04        | 2.72E-03 | 1.85E-02 |
| 1-linoleoylglycerol (18:2)                | Lipid                     | Monoacylglycerol                                  | -1.56          | 0.41           | 1.36E-04        | 2.89E-03 | 1.97E-02 |
| linolenate (18:3n3 or 3n6)                | Lipid                     | Long Chain Polyunsaturated Fatty Acid (n3 and n6) | -1.53          | 0.40           | 1.52E-04        | 3.02E-03 | 2.06E-02 |
| glutamate                                 | Amino Acid                | Glutamate Metabolism                              | -1.51          | 0.40           | 1.53E-04        | 3.02E-03 | 2.06E-02 |
| sphingomyelin (d18:2/16:0, d18:1/16:1)    | Lipid                     | Sphingomyelins                                    | -1.52          | 0.40           | 1.66E-04        | 3.08E-03 | 2.10E-02 |
| 1-stearoyl-2-linoleoyl-GPC (18:0/18:2)    | Lipid                     | Phosphatidylcholine (PC)                          | -1.52          | 0.40           | 1.69E-04        | 3.08E-03 | 2.10E-02 |

## Online Supplementary File 2

| Metabolite                                         | Super-pathway | Sub-pathway                                       | Estimated beta | Standard error | P-value  | BH FDR   | BY FDR   |
|----------------------------------------------------|---------------|---------------------------------------------------|----------------|----------------|----------|----------|----------|
| linoleoyl-linoleoyl-glycerol (18:2/18:2)           | Lipid         | Diacylglycerol                                    | -1.48          | 0.39           | 2.07E-04 | 3.51E-03 | 2.39E-02 |
| prolylhydroxyproline                               | Amino Acid    | Urea cycle; Arginine and Proline Metabolism       | -1.52          | 0.41           | 2.11E-04 | 3.51E-03 | 2.39E-02 |
| 1,2-dilinoleoyl-GPC (18:2/18:2)                    | Lipid         | Phosphatidylcholine (PC)                          | -1.47          | 0.39           | 2.13E-04 | 3.51E-03 | 2.39E-02 |
| 1-stearoyl-2-linoleoyl-GPI (18:0/18:2)             | Lipid         | Phosphatidylinositol (PI)                         | -1.46          | 0.40           | 2.59E-04 | 4.08E-03 | 2.78E-02 |
| 1-stearoyl-2-linoleoyl-GPE (18:0/18:2)             | Lipid         | Phosphatidylethanolamine (PE)                     | -1.55          | 0.42           | 2.63E-04 | 4.08E-03 | 2.78E-02 |
| 1-linoleoyl-GPG (18:2)                             | Lipid         | Lysophospholipid                                  | -1.46          | 0.40           | 3.00E-04 | 4.51E-03 | 3.07E-02 |
| cystine                                            | Amino Acid    | Methionine, Cysteine, SAM and Taurine Metabolism  | 1.44           | 0.40           | 3.14E-04 | 4.58E-03 | 3.12E-02 |
| 1-palmitoyl-2-linoleoyl-GPE (16:0/18:2)            | Lipid         | Phosphatidylethanolamine (PE)                     | -1.52          | 0.42           | 3.50E-04 | 4.96E-03 | 3.38E-02 |
| N-acetylglucosamine/N-acetylgalactosamine          | Carbohydrate  | Aminosugar Metabolism                             | -1.42          | 0.40           | 4.09E-04 | 5.52E-03 | 3.76E-02 |
| oleoyl-linoleoyl-glycerol (18:1/18:2)              | Lipid         | Diacylglycerol                                    | -1.42          | 0.40           | 4.10E-04 | 5.52E-03 | 3.76E-02 |
| 1-palmitoyl-GPE (16:0)                             | Lipid         | Lysophospholipid                                  | -1.42          | 0.40           | 4.29E-04 | 5.62E-03 | 3.83E-02 |
| 2-aminoheptanoate                                  | Lipid         | Fatty Acid, Amino                                 | -1.44          | 0.41           | 5.04E-04 | 6.44E-03 | 4.39E-02 |
| palmitoyl-linoleoyl-glycerol (16:0/18:2)           | Lipid         | Diacylglycerol                                    | -1.38          | 0.40           | 5.89E-04 | 7.35E-03 | 5.01E-02 |
| arachidonate (20:4n6)                              | Lipid         | Long Chain Polyunsaturated Fatty Acid (n3 and n6) | -1.40          | 0.40           | 6.20E-04 | 7.54E-03 | 5.14E-02 |
| docosapentaenoate (n6 DPA; 22:5n6)                 | Lipid         | Long Chain Polyunsaturated Fatty Acid (n3 and n6) | -1.40          | 0.41           | 6.47E-04 | 7.58E-03 | 5.17E-02 |
| palmitate (16:0)                                   | Lipid         | Long Chain Saturated Fatty Acid                   | -1.39          | 0.40           | 6.56E-04 | 7.58E-03 | 5.17E-02 |
| 1-(1-enyl-palmitoyl)-GPE (P-16:0)                  | Lipid         | Lysoplasmalogen                                   | -1.35          | 0.39           | 6.68E-04 | 7.58E-03 | 5.17E-02 |
| N-acetyltaurine                                    | Amino Acid    | Methionine, Cysteine, SAM and Taurine Metabolism  | -1.36          | 0.40           | 6.96E-04 | 7.74E-03 | 5.27E-02 |
| oleate/vaccenate (18:1)                            | Lipid         | Long Chain Monounsaturated Fatty Acid             | -1.35          | 0.40           | 8.30E-04 | 9.00E-03 | 6.13E-02 |
| 1-stearoyl-GPC (18:0)                              | Lipid         | Lysophospholipid                                  | -1.33          | 0.39           | 8.46E-04 | 9.00E-03 | 6.13E-02 |
| cholesterol                                        | Lipid         | Sterol                                            | -1.35          | 0.40           | 8.82E-04 | 9.00E-03 | 6.13E-02 |
| glycine                                            | Amino Acid    | Glycine, Serine and Threonine Metabolism          | -1.33          | 0.40           | 8.89E-04 | 9.00E-03 | 6.13E-02 |
| 1-(1-enyl-palmitoyl)-2-linoleoyl-GPC (P-16:0/18:2) | Lipid         | Plasmalogen                                       | -1.41          | 0.42           | 8.98E-04 | 9.00E-03 | 6.13E-02 |
| serine                                             | Amino Acid    | Glycine, Serine and Threonine Metabolism          | -1.32          | 0.40           | 9.43E-04 | 9.15E-03 | 6.24E-02 |
| 1-linoleoyl-2-linolenoyl-GPC (18:2/18:3)           | Lipid         | Phosphatidylcholine (PC)                          | -1.34          | 0.40           | 9.49E-04 | 9.15E-03 | 6.24E-02 |

Abbreviations: ENT80, effective number of independent tests that accounts for 80% of variation in metabolites; VDAART, Vitamin D Antenatal Asthma Reduction Trial; 25(OH)D, 25-hydroxyvitamin D.

**Supplemental Table S3.** Comparison of results from primary and sensitivity analysis altering model adjustment

|                                          |                                                   | Age 1 results         |          |                       |          |                       |          |
|------------------------------------------|---------------------------------------------------|-----------------------|----------|-----------------------|----------|-----------------------|----------|
|                                          |                                                   | Primary model results |          | Sensitivity 1 results |          | Sensitivity 2 results |          |
| Metabolite                               | Sub-pathway                                       | Estimated beta        | P-value  | Estimated beta        | P-value  | Estimated beta        | P-value  |
| docosapentaenoate (n6 DPA; 22:5n6)       | Long Chain Polyunsaturated Fatty Acid (n3 and n6) | -2.27                 | 9.74E-06 | -2.29                 | 7.12E-06 | -2.28                 | 9.11E-06 |
| glycine                                  | Glycine, Serine and Threonine Metabolism          | -2.06                 | 3.03E-05 | -2.04                 | 3.57E-05 | -2.07                 | 2.71E-05 |
| 1-palmitoyl-GPE (16:0)                   | Lysophospholipid                                  | -2.00                 | 4.22E-05 | -2.00                 | 4.28E-05 | -2.00                 | 4.42E-05 |
| serine                                   | Glycine, Serine and Threonine Metabolism          | -1.96                 | 7.21E-05 | -1.95                 | 7.56E-05 | -1.95                 | 8.26E-05 |
| N-acetyltaurine                          | Methionine, Cysteine, SAM and Taurine Metabolism  | -1.95                 | 7.75E-05 | -1.96                 | 7.05E-05 | -1.94                 | 8.17E-05 |
| N-palmitoylglycine                       | Fatty Acid Metabolism (Acyl Glycine)              | -1.91                 | 1.23E-04 | -1.93                 | 1.09E-04 | -1.92                 | 1.21E-04 |
| sphingomyelin (d18:2/16:0, d18:1/16:1)   | Sphingomyelins                                    | -1.80                 | 3.06E-04 | -1.81                 | 2.73E-04 | -1.80                 | 3.10E-04 |
| arachidonate (20:4n6)                    | Long Chain Polyunsaturated Fatty Acid (n3 and n6) | -1.78                 | 3.10E-04 | -1.79                 | 2.78E-04 | -1.77                 | 3.34E-04 |
| palmitoyl-linoleoyl-glycerol (16:0/18:2) | Diacylglycerol                                    | -1.68                 | 5.83E-04 | -1.69                 | 5.51E-04 | -1.68                 | 5.95E-04 |
| linoleate (18:2n6)                       | Long Chain Polyunsaturated Fatty Acid (n3 and n6) | -1.65                 | 7.23E-04 | -1.67                 | 6.07E-04 | -1.65                 | 7.50E-04 |
| hydroxyproline                           | Urea cycle; Arginine and Proline Metabolism       | -1.75                 | 7.38E-04 | -1.75                 | 7.46E-04 | -1.79                 | 5.80E-04 |
| 1-stearoyl-GPE (18:0)                    | Lysophospholipid                                  | -1.65                 | 7.44E-04 | -1.65                 | 7.33E-04 | -1.64                 | 7.99E-04 |
|                                          |                                                   | Age 3 results         |          |                       |          |                       |          |
|                                          |                                                   | Primary model results |          | Sensitivity 1 results |          | Sensitivity 2 results |          |
| Metabolite                               | Sub-pathway                                       | Estimated beta        | P-value  | Estimated beta        | P-value  | Estimated beta        | P-value  |
| docosapentaenoate (n6 DPA; 22:5n6)       | Long Chain Polyunsaturated Fatty Acid (n3 and n6) | -1.40                 | 6.47E-04 | -1.38                 | 6.33E-04 | -1.42                 | 5.90E-04 |
| glycine                                  | Glycine, Serine and Threonine Metabolism          | -1.33                 | 8.89E-04 | -1.33                 | 8.63E-04 | -1.38                 | 6.71E-04 |

Online Supplementary File 2

|                                          |                                                   |       |          |       |          |       |          |
|------------------------------------------|---------------------------------------------------|-------|----------|-------|----------|-------|----------|
| 1-palmitoyl-GPE (16:0)                   | Lysophospholipid                                  | -1.42 | 4.29E-04 | -1.42 | 4.00E-04 | -1.47 | 3.28E-04 |
| serine                                   | Glycine, Serine and Threonine Metabolism          | -1.32 | 9.43E-04 | -1.32 | 9.36E-04 | -1.36 | 7.58E-04 |
| N-acetyltaurine                          | Methionine, Cysteine, SAM and Taurine Metabolism  | -1.36 | 6.96E-04 | -1.36 | 7.03E-04 | -1.36 | 7.04E-04 |
| N-palmitoylglycine                       | Fatty Acid Metabolism (Acyl Glycine)              | -1.57 | 9.27E-05 | -1.58 | 8.75E-05 | -1.58 | 9.15E-05 |
| sphingomyelin (d18:2/16:0, d18:1/16:1)   | Sphingomyelins                                    | -1.52 | 1.66E-04 | -1.53 | 1.55E-04 | -1.53 | 1.63E-04 |
| arachidonate (20:4n6)                    | Long Chain Polyunsaturated Fatty Acid (n3 and n6) | -1.40 | 6.20E-04 | -1.39 | 5.79E-04 | -1.40 | 5.94E-04 |
| palmitoyl-linoleoyl-glycerol (16:0/18:2) | Diacylglycerol                                    | -1.38 | 5.89E-04 | -1.38 | 5.51E-04 | -1.40 | 5.33E-04 |
| linoleate (18:2n6)                       | Long Chain Polyunsaturated Fatty Acid (n3 and n6) | -1.65 | 4.70E-05 | -1.65 | 4.37E-05 | -1.65 | 4.62E-05 |
| hydroxyproline                           | Urea cycle; Arginine and Proline Metabolism       | -1.67 | 5.06E-05 | -1.67 | 4.89E-05 | -1.68 | 4.70E-05 |
| 1-stearoyl-GPE (18:0)                    | Lysophospholipid                                  | -1.57 | 6.57E-05 | -1.58 | 6.11E-05 | -1.60 | 5.55E-05 |

Results for metabolites passing ENT80 threshold at both age 1 and age 3 in primary analysis (Table 3) are listed here

Sensitivity 1: removing asthma or recurrent wheezing status by age 3 from the primary analysis model

Sensitivity 2: adding maternal treatment group to the primary analysis model

**Supplemental Table S4.** Characteristics of children according to whether they are in analytical sample at age 1

|                                                |                        | Not in analytical sample<br>(n = 356) | In analytical sample<br>(n = 450) | P-value <sup>1</sup> |
|------------------------------------------------|------------------------|---------------------------------------|-----------------------------------|----------------------|
| Sex, n (%)                                     |                        |                                       |                                   | 0.180                |
|                                                | Female                 | 180 (50.6)                            | 205 (45.6)                        |                      |
|                                                | Male                   | 176 (49.4)                            | 245 (54.4)                        |                      |
| Race, n (%)                                    |                        |                                       |                                   | 0.755                |
|                                                | African American       | 169 (47.5)                            | 221 (49.1)                        |                      |
|                                                | Other                  | 65 (18.3)                             | 86 (19.1)                         |                      |
|                                                | White                  | 122 (34.3)                            | 143 (31.8)                        |                      |
| Ethnicity, n (%)                               |                        |                                       |                                   | 0.289                |
|                                                | Hispanic or Latino     | 113 (31.7)                            | 160 (35.6)                        |                      |
|                                                | Not Hispanic or Latino | 243 (68.3)                            | 290 (64.4)                        |                      |
| Study site, n (%)                              |                        |                                       |                                   | 0.637                |
|                                                | Boston                 | 100 (28.1)                            | 140 (31.1)                        |                      |
|                                                | San Diego              | 125 (35.1)                            | 149 (33.1)                        |                      |
|                                                | St. Louis              | 131 (36.8)                            | 161 (35.8)                        |                      |
| Treatment (maternal), n (%)                    |                        |                                       |                                   | 0.513                |
|                                                | 4400 IU/day vitamin D  | 184 (51.7)                            | 221 (49.1)                        |                      |
|                                                | 400 IU/day vitamin D   | 172 (48.3)                            | 229 (50.9)                        |                      |
| Asthma/wheeze by age 3, n (%) <sup>2</sup>     |                        |                                       |                                   | 0.124                |
|                                                | No                     | 221 (74.2)                            | 309 (68.7)                        |                      |
|                                                | Yes                    | 77 (25.8)                             | 141 (31.3)                        |                      |
| BMI kg/m <sup>2</sup> , mean (SD) <sup>2</sup> |                        | 17.7 (2.0)                            | 17.4 (2.2)                        | 0.065                |

<sup>1</sup> Significance of difference was evaluated using chi-squared test for categorical variables and two-sample t-test for continuous variables.

<sup>2</sup> In those not included in analytical sample at age 1, 58 children were missing asthma/wheeze by age 3; 102 were missing BMI.

Abbreviations: BMI, body mass index; SD, standard deviation.



**Supplemental Table S5.** Characteristics of children according to whether they are in analytical sample at age 3

|                                            |                        | Not in analytical sample<br>(n = 399) | In analytical sample<br>(n = 407) | P-value <sup>1</sup> |
|--------------------------------------------|------------------------|---------------------------------------|-----------------------------------|----------------------|
| Sex, n (%)                                 |                        |                                       |                                   | 0.489                |
|                                            | Female                 | 196 (49.1)                            | 189 (46.4)                        |                      |
|                                            | Male                   | 203 (50.9)                            | 218 (53.6)                        |                      |
| Race, n (%)                                |                        |                                       |                                   | 0.988                |
|                                            | African American       | 193 (48.4)                            | 197 (48.4)                        |                      |
|                                            | White                  | 132 (33.1)                            | 133 (32.7)                        |                      |
|                                            | Other                  | 74 (18.5)                             | 77 (18.9)                         |                      |
| Ethnicity, n (%)                           |                        |                                       |                                   | 0.344                |
|                                            | Hispanic or Latino     | 142 (35.6)                            | 131 (32.2)                        |                      |
|                                            | Not Hispanic or Latino | 257 (64.4)                            | 276 (67.8)                        |                      |
| Study site, n (%)                          |                        |                                       |                                   | <0.001               |
|                                            | San Diego              | 134 (33.6)                            | 140 (34.4)                        |                      |
|                                            | Boston                 | 154 (38.6)                            | 86 (21.1)                         |                      |
|                                            | St. Louis              | 111 (27.8)                            | 181 (44.5)                        |                      |
| Treatment (maternal), n (%)                |                        |                                       |                                   | 0.674                |
|                                            | 4400 IU/day vitamin D  | 197 (49.4)                            | 208 (51.1)                        |                      |
|                                            | 400 IU/day vitamin D   | 202 (50.6)                            | 199 (48.9)                        |                      |
| Asthma/wheeze by age 3, n (%) <sup>2</sup> |                        |                                       |                                   | 0.050                |
|                                            | No                     | 229 (67.2)                            | 301 (74.0)                        |                      |
|                                            | Yes                    | 112 (32.8)                            | 106 (26.0)                        |                      |
| BMI kg/m2, mean (SD) <sup>2</sup>          |                        | 16.6 (1.5)                            | 16.7 (1.9)                        | 0.594                |

<sup>1</sup> Significance of difference was evaluated using chi-squared test for categorical variables and two-sample t-test for continuous variables.

<sup>2</sup> In those not included in analytical sample at age 3, 58 children were missing asthma/wheeze by age 3; 149 were missing BMI.

Abbreviations: BMI, body mass index; SD, standard deviation.

**Supplemental Table S6.** Characteristics of CAMP participants at baseline who were included in replication analysis

|                                               | All subjects<br>(n = 542) | 25(OH)D ≤ 30 ng/mL<br>(n = 195) | 25(OH)D > 30 ng/mL<br>(n = 347) | P-value <sup>1</sup> |
|-----------------------------------------------|---------------------------|---------------------------------|---------------------------------|----------------------|
| 25(OH)D ng/mL, mean (SD)                      | 37.9 (15.6)               | 23.1 (5.4)                      | 46.2 (13.0)                     | <0.001               |
| Age at baseline, mean (SD)                    | 8.8 (2.1)                 | 9.2 (2.2)                       | 8.6 (2.1)                       | 0.003                |
| Sex, n (%)                                    |                           |                                 |                                 | 0.500                |
| Female                                        | 197 (36.3)                | 75 (38.5)                       | 122 (35.2)                      |                      |
| Male                                          | 345 (63.7)                | 120 (61.5)                      | 225 (64.8)                      |                      |
| Race/ethnicity, n (%)                         |                           |                                 |                                 | <0.001               |
| Non-Hispanic white                            | 379 (69.9)                | 106 (54.4)                      | 273 (78.7)                      |                      |
| Non-Hispanic black                            | 81 (14.9)                 | 54 (27.7)                       | 27 (7.8)                        |                      |
| Hispanic                                      | 56 (10.3)                 | 20 (10.3)                       | 36 (10.4)                       |                      |
| Other                                         | 26 (4.8)                  | 15 (7.7)                        | 11 (3.2)                        |                      |
| Treatment group, n (%)                        |                           |                                 |                                 | 0.127                |
| Budesonide                                    | 147 (27.1)                | 45 (23.1)                       | 102 (29.4)                      |                      |
| Nedocromil                                    | 166 (30.6)                | 69 (35.4)                       | 97 (28.0)                       |                      |
| Placebo                                       | 229 (42.3)                | 81 (41.5)                       | 148 (42.7)                      |                      |
| Study clinic, n (%)                           |                           |                                 |                                 | <0.001               |
| 1                                             | 67 (12.4)                 | 15 (7.7)                        | 52 (15.0)                       |                      |
| 2                                             | 62 (11.4)                 | 29 (14.9)                       | 33 (9.5)                        |                      |
| 3                                             | 44 (8.1)                  | 22 (11.3)                       | 22 (6.3)                        |                      |
| 4                                             | 68 (12.5)                 | 19 (9.7)                        | 49 (14.1)                       |                      |
| 5                                             | 61 (11.3)                 | 16 (8.2)                        | 45 (13.0)                       |                      |
| 6                                             | 66 (12.2)                 | 29 (14.9)                       | 37 (10.7)                       |                      |
| 7                                             | 103 (19.0)                | 30 (15.4)                       | 73 (21.0)                       |                      |
| 8                                             | 71 (13.1)                 | 35 (17.9)                       | 36 (10.4)                       |                      |
| Season of blood draw, n (%)                   |                           |                                 |                                 | <0.001               |
| Spring                                        | 214 (39.5)                | 90 (46.2)                       | 124 (35.7)                      |                      |
| Summer                                        | 128 (23.6)                | 25 (12.8)                       | 103 (29.7)                      |                      |
| Fall                                          | 81 (14.9)                 | 28 (14.4)                       | 53 (15.3)                       |                      |
| Winter                                        | 119 (22.0)                | 52 (15.3)                       | 67 (19.3)                       |                      |
| BMI at baseline kg/m <sup>2</sup> , mean (SD) | 18.0 (3.3)                | 18.6 (3.6)                      | 17.6 (3.1)                      | 0.001                |

<sup>1</sup> Significance of difference was evaluated using chi-squared test for categorical variables and two-sample t-test for continuous variables.

Abbreviations: BMI, body mass index; CAMP, Childhood Asthma Management Program; SD, standard deviation; 25(OH)D, 25-hydroxyvitamin D.

**Supplemental Table S7.** Characteristics of CAMP participants at end of trial who were included in replication analysis

|                                                   | All subjects<br>(n = 561) | 25(OH)D ≤ 30 ng/ml<br>(n = 318) | 25(OH)D > 30 ng/ml<br>(n = 243) | P-value <sup>1</sup> |
|---------------------------------------------------|---------------------------|---------------------------------|---------------------------------|----------------------|
| 25(OH)D ng/ml, mean (SD)                          | 30.4 (14.5)               | 20.6 (6.1)                      | 43.2 (12.2)                     | <0.001               |
| Age at end of trial, mean (SD)                    | 12.8 (2.2)                | 13.0 (2.1)                      | 12.5 (2.2)                      | 0.015                |
| Sex, n (%)                                        |                           |                                 |                                 | 0.024                |
| Female                                            | 206 (36.7)                | 130 (40.9)                      | 76 (31.3)                       |                      |
| Male                                              | 355 (63.3)                | 188 (59.1)                      | 167 (68.7)                      |                      |
| Race/ethnicity, n (%)                             |                           |                                 |                                 | <0.001               |
| Non-Hispanic white                                | 397 (70.8)                | 197 (61.9)                      | 200 (82.3)                      |                      |
| Non-Hispanic black                                | 81 (14.4)                 | 68 (21.4)                       | 13 (5.3)                        |                      |
| Hispanic                                          | 56 (10.0)                 | 39 (12.3)                       | 17 (7.0)                        |                      |
| Other                                             | 27 (4.8)                  | 14 (4.4)                        | 13 (5.3)                        |                      |
| Treatment group, n (%)                            |                           |                                 |                                 | 0.748                |
| Budesonide                                        | 155 (27.6)                | 84 (26.4)                       | 71 (29.2)                       |                      |
| Nedocromil                                        | 170 (30.3)                | 97 (30.5)                       | 73 (30.0)                       |                      |
| Placebo                                           | 236 (42.1)                | 137 (43.1)                      | 99 (40.7)                       |                      |
| Study clinic, n (%)                               |                           |                                 |                                 | <0.001               |
| 1                                                 | 68 (12.1)                 | 41 (12.9)                       | 27 (11.1)                       |                      |
| 2                                                 | 64 (11.4)                 | 45 (14.2)                       | 19 (7.8)                        |                      |
| 3                                                 | 44 (7.8)                  | 35 (11.0)                       | 9 (3.7)                         |                      |
| 4                                                 | 71 (12.7)                 | 49 (15.4)                       | 22 (9.1)                        |                      |
| 5                                                 | 61 (10.9)                 | 13 (4.1)                        | 48 (19.8)                       |                      |
| 6                                                 | 77 (13.7)                 | 41 (12.9)                       | 36 (14.8)                       |                      |
| 7                                                 | 104 (18.5)                | 50 (15.7)                       | 54 (22.2)                       |                      |
| 8                                                 | 72 (12.8)                 | 44 (13.8)                       | 28 (11.5)                       |                      |
| Season of blood draw, n (%)                       |                           |                                 |                                 | <0.001               |
| Spring                                            | 228 (40.6)                | 139 (43.7)                      | 89 (36.6)                       |                      |
| Summer                                            | 124 (22.1)                | 40 (12.6)                       | 84 (34.6)                       |                      |
| Fall                                              | 90 (16.0)                 | 60 (18.9)                       | 30 (12.3)                       |                      |
| Winter                                            | 119 (21.2)                | 79 (24.8)                       | 40 (16.5)                       |                      |
| BMI at end of trial kg/m <sup>2</sup> , mean (SD) | 21.2 (4.5)                | 21.8 (4.8)                      | 20.4 (3.9)                      | <0.001               |

<sup>1</sup> Significance of difference was evaluated using chi-squared test for categorical variables and two-sample t-test for continuous variables.

Abbreviations: BMI, body mass index; CAMP, Childhood Asthma Management Program; SD, standard deviation; 25(OH)D, 25-hydroxyvitamin D.

**Supplemental Table S8.** Replication analysis results in CAMP (sorted by end-of-trial results *P*-values)

| Metabolite             | Baseline results |                |                 | End-of-trial results |                |                 |
|------------------------|------------------|----------------|-----------------|----------------------|----------------|-----------------|
|                        | Estimated beta   | Standard error | <i>P</i> -value | Estimated beta       | Standard error | <i>P</i> -value |
| glycine                | -0.36            | 0.64           | 5.71E-01        | -2.95                | 0.54           | 7.43E-08        |
| serine                 | -0.59            | 0.66           | 3.74E-01        | -2.94                | 0.57           | 3.52E-07        |
| hydroxyproline         | -0.09            | 0.63           | 8.81E-01        | -2.16                | 0.51           | 2.62E-05        |
| $\gamma$ -linolenate   | -0.88            | 0.64           | 1.74E-01        | -2.18                | 0.57           | 1.58E-04        |
| linoleate              | -0.50            | 0.66           | 4.52E-01        | -2.14                | 0.56           | 1.65E-04        |
| linoleoyl ethanolamide | 0.71             | 0.64           | 2.62E-01        | -1.91                | 0.56           | 7.18E-04        |
| docosapentaenoate      | -0.52            | 0.64           | 4.19E-01        | -1.88                | 0.57           | 1.01E-03        |
| arachidonate           | -0.45            | 0.72           | 5.30E-01        | -1.64                | 0.59           | 6.10E-03        |

Abbreviations: CAMP, Childhood Asthma Management Program.
